# Supplementary material for: Combined mitoxantrone and anti-TGFβ treatment with PD-1 blockade enhances antitumor immunity by remodelling the tumor immune landscape in neuroblastoma
Source: Springer Nature journal article supplement (doi:10.1186/s13046-022-02525-9), 2022-11-17
Supplement: MOESM1 [file 23723370]

Figure S1

A

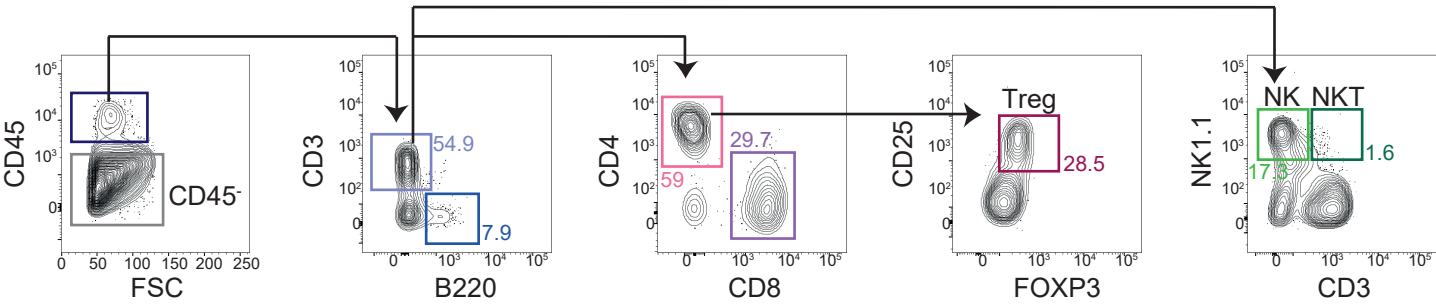

B

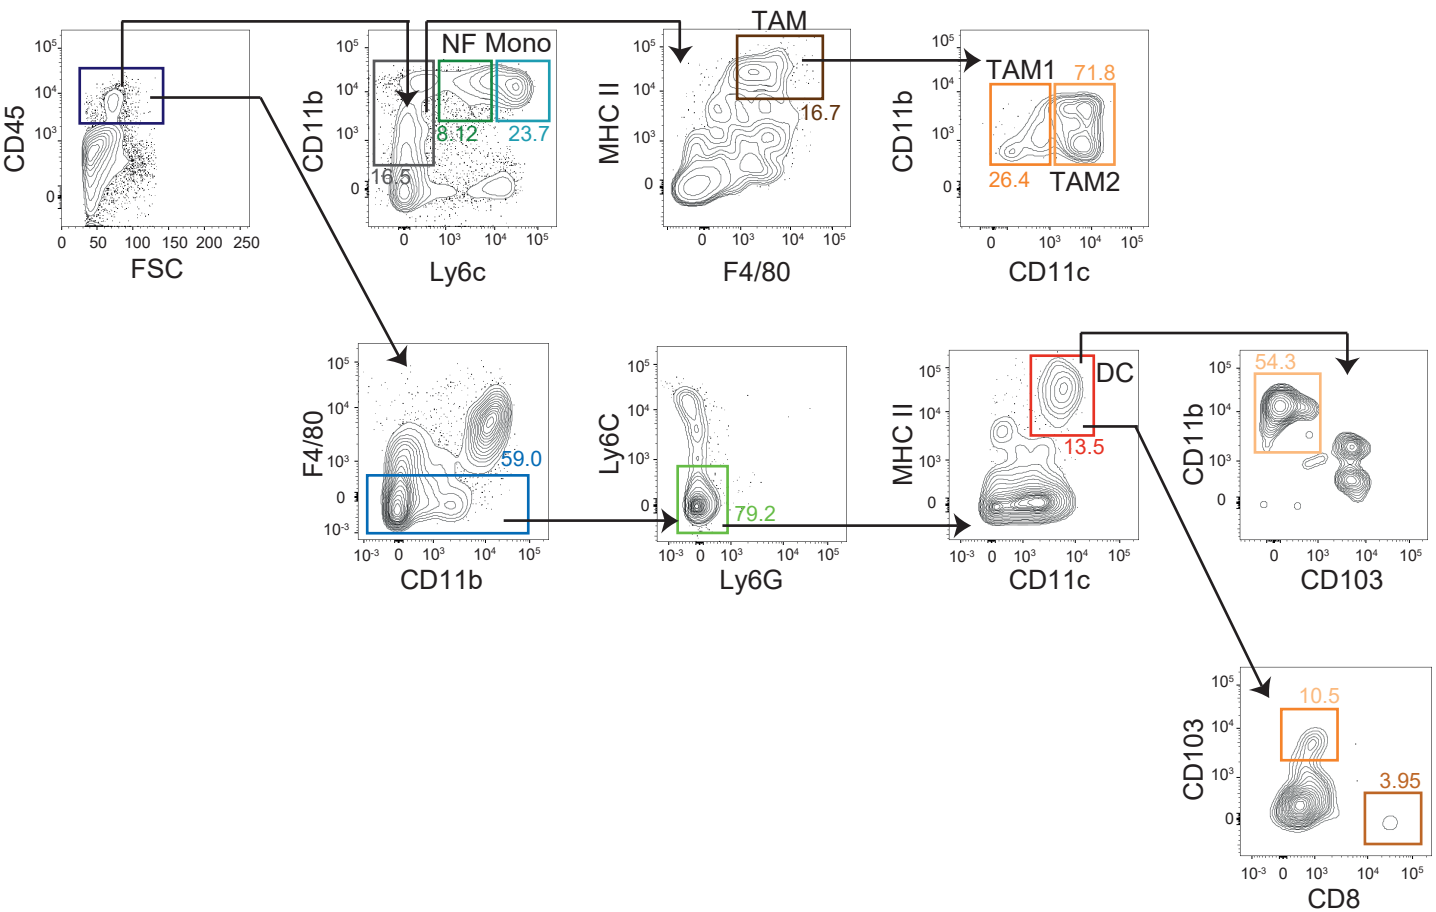

C

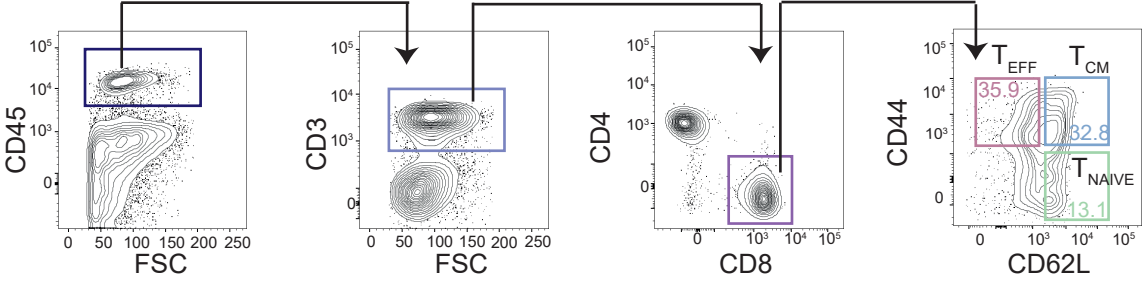

**Figure S1, related to Figure 1. Flow-cytometry analysis of tumor-infiltrating immune cells in mouse NB models.** Representative flow cytometric gating strategy for 975A2 tumors to define tumor-infiltrating lymphoid cells (**A**), myeloid cells (**B**) and naïve and memory T cells (**C**).



**Figure S2**

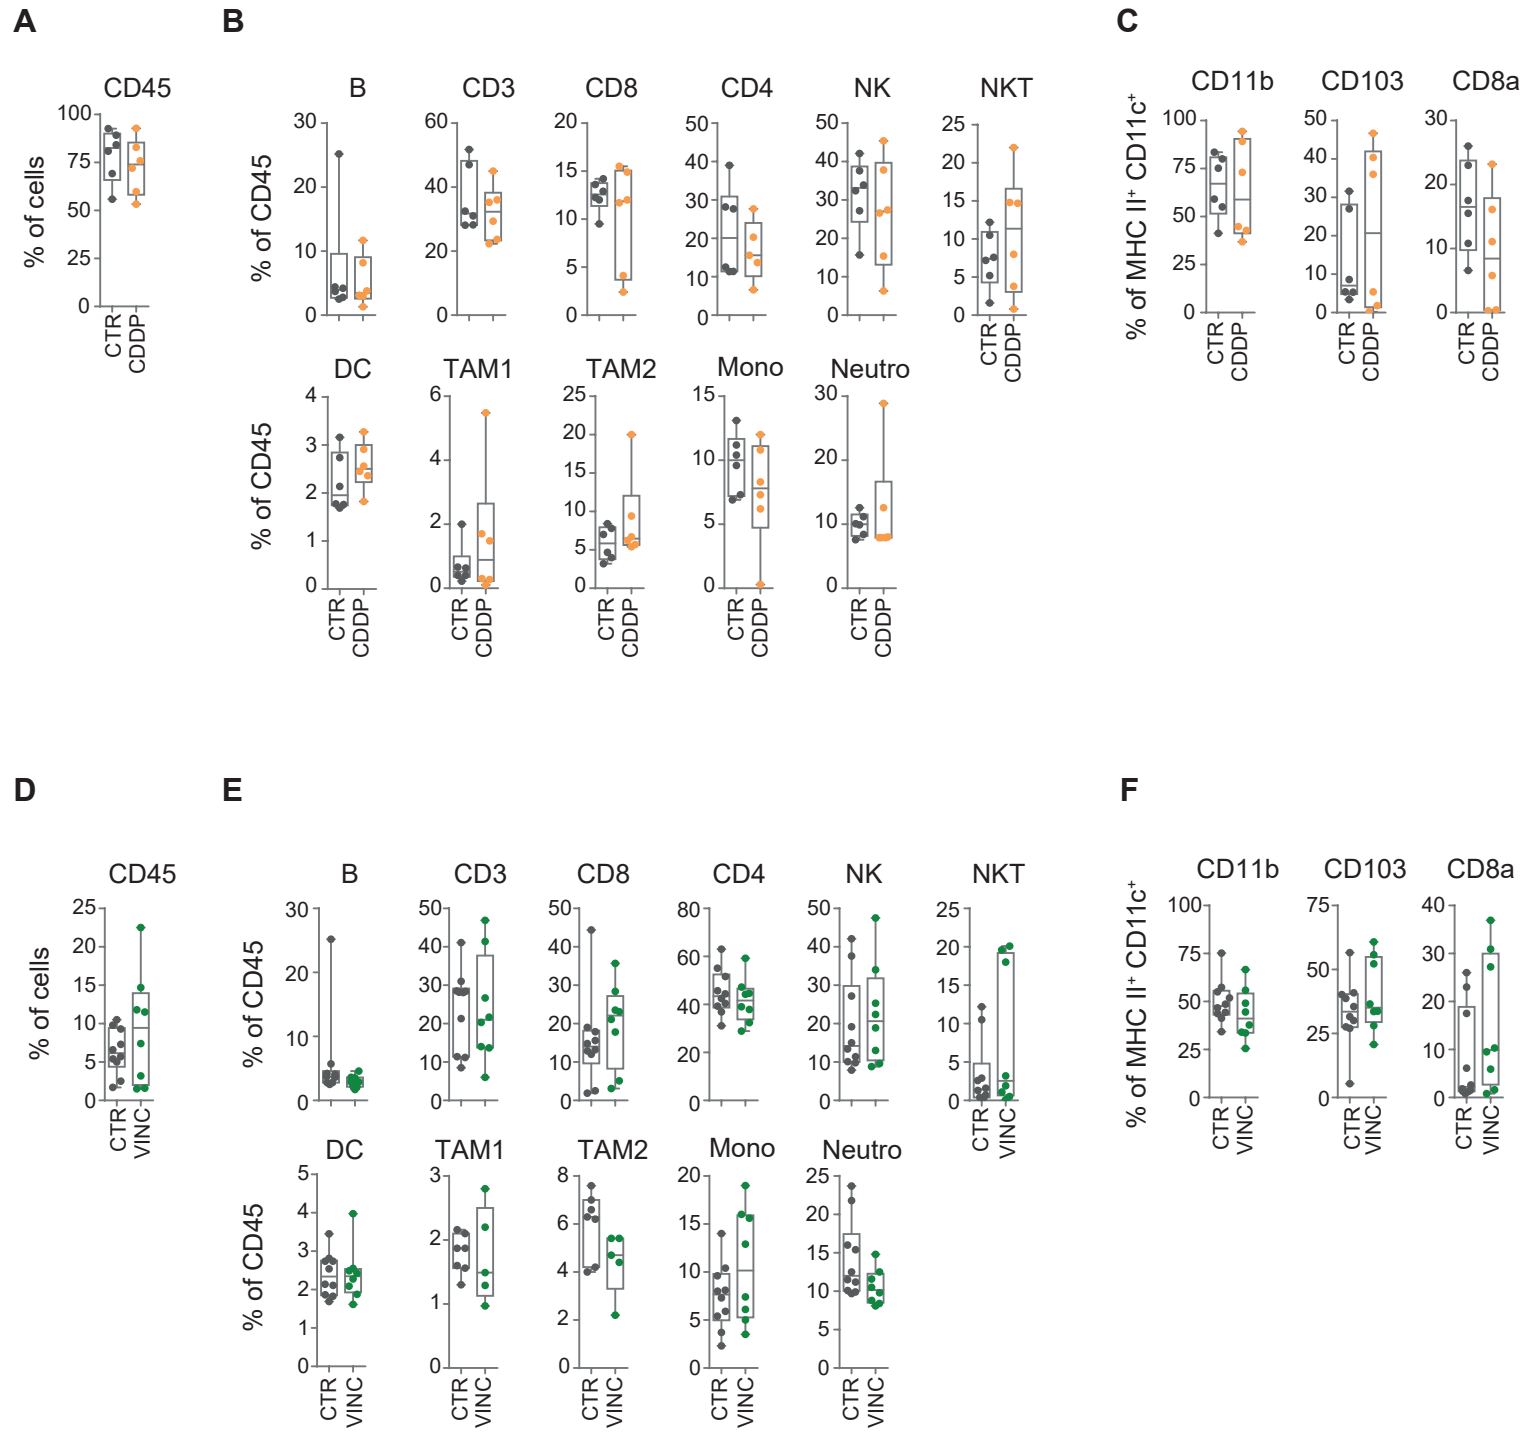

**Figure S2, related to Figure 2. Immune content of cisplatin- and vincristine-treated 975A2 tumors.** Flow-cytometry analysis of the immune compartment in 975A2 tumors treated with cisplatin (**A-C**) and vincristine (**D-F**) for 7 days. Levels of significance for comparison between samples were determined by two-tailed Student's t test. CTR, vehicle control; CDDP, cisplatin; VINC, vincristine. Non-significant data are shown.

**Figure S3**

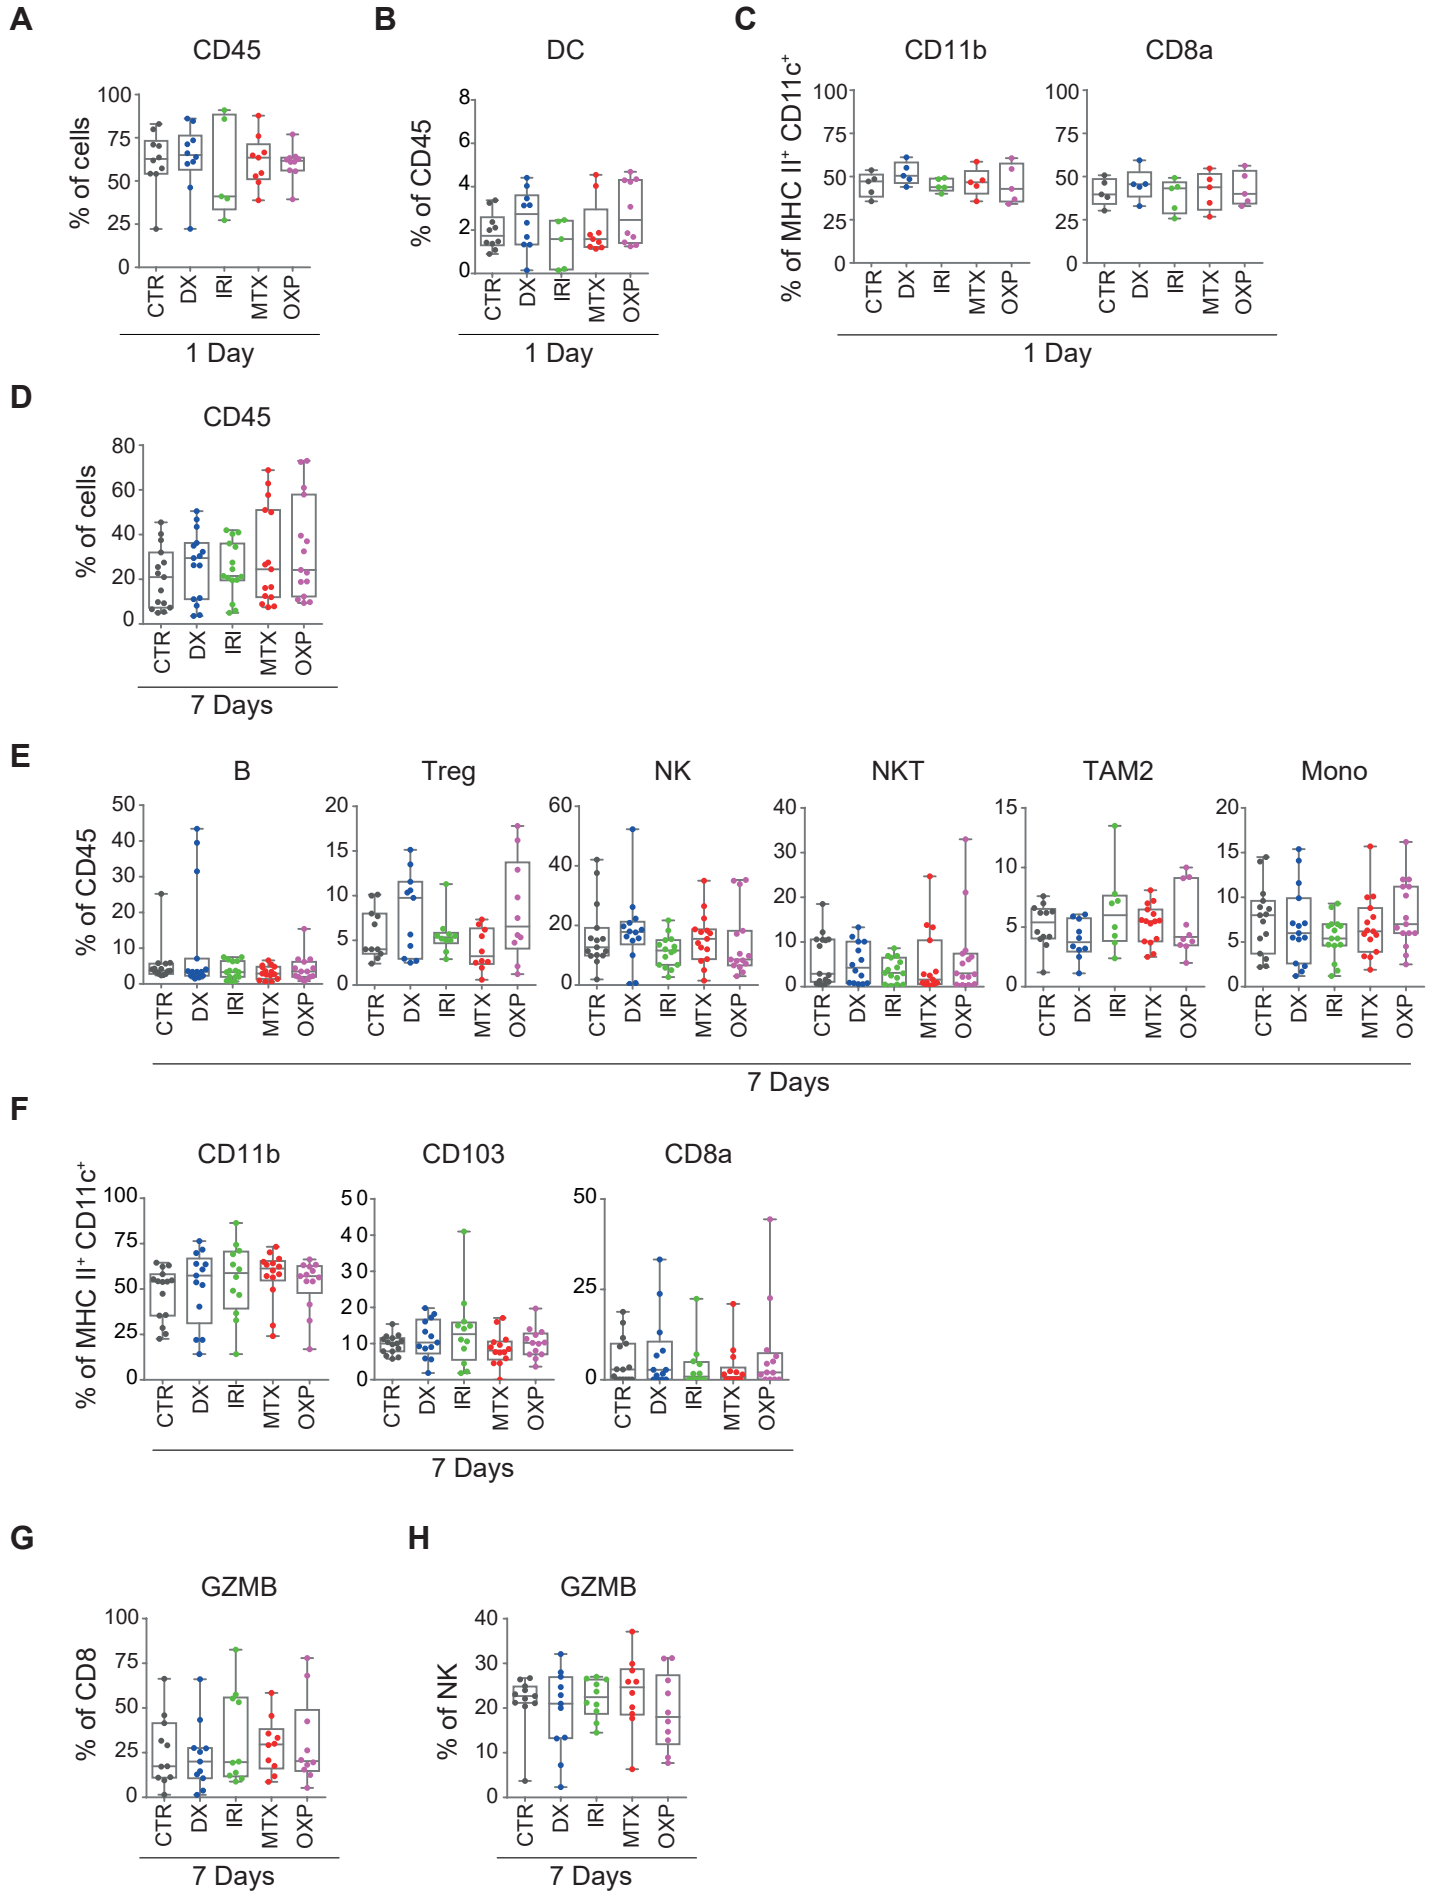

**Figure S3 related to Figure 2. Immune content of drug-treated 975A2 tumors.** Flow-cytometry analysis of the immune content in 975A2 tumors 1 day (**A-C**) and 7 days (**D-F**) after treatment with the indicated drugs. (**G-H**) Flow-cytometry analysis of the granzyme B expression in tumor-infiltrating CD8<sup>+</sup> T cells (**G**) and NK cells (**H**) in 975A2 tumors 7 days after treatment. Levels of significance for comparison between samples were determined by ANOVA. CTR, vehicle control; DX, doxorubicin; IRI, irinotecan; MTX, mitoxantrone; OXP, oxaliplatin; GZMB, granzyme B. Non-significant data are shown.

**Figure S4**

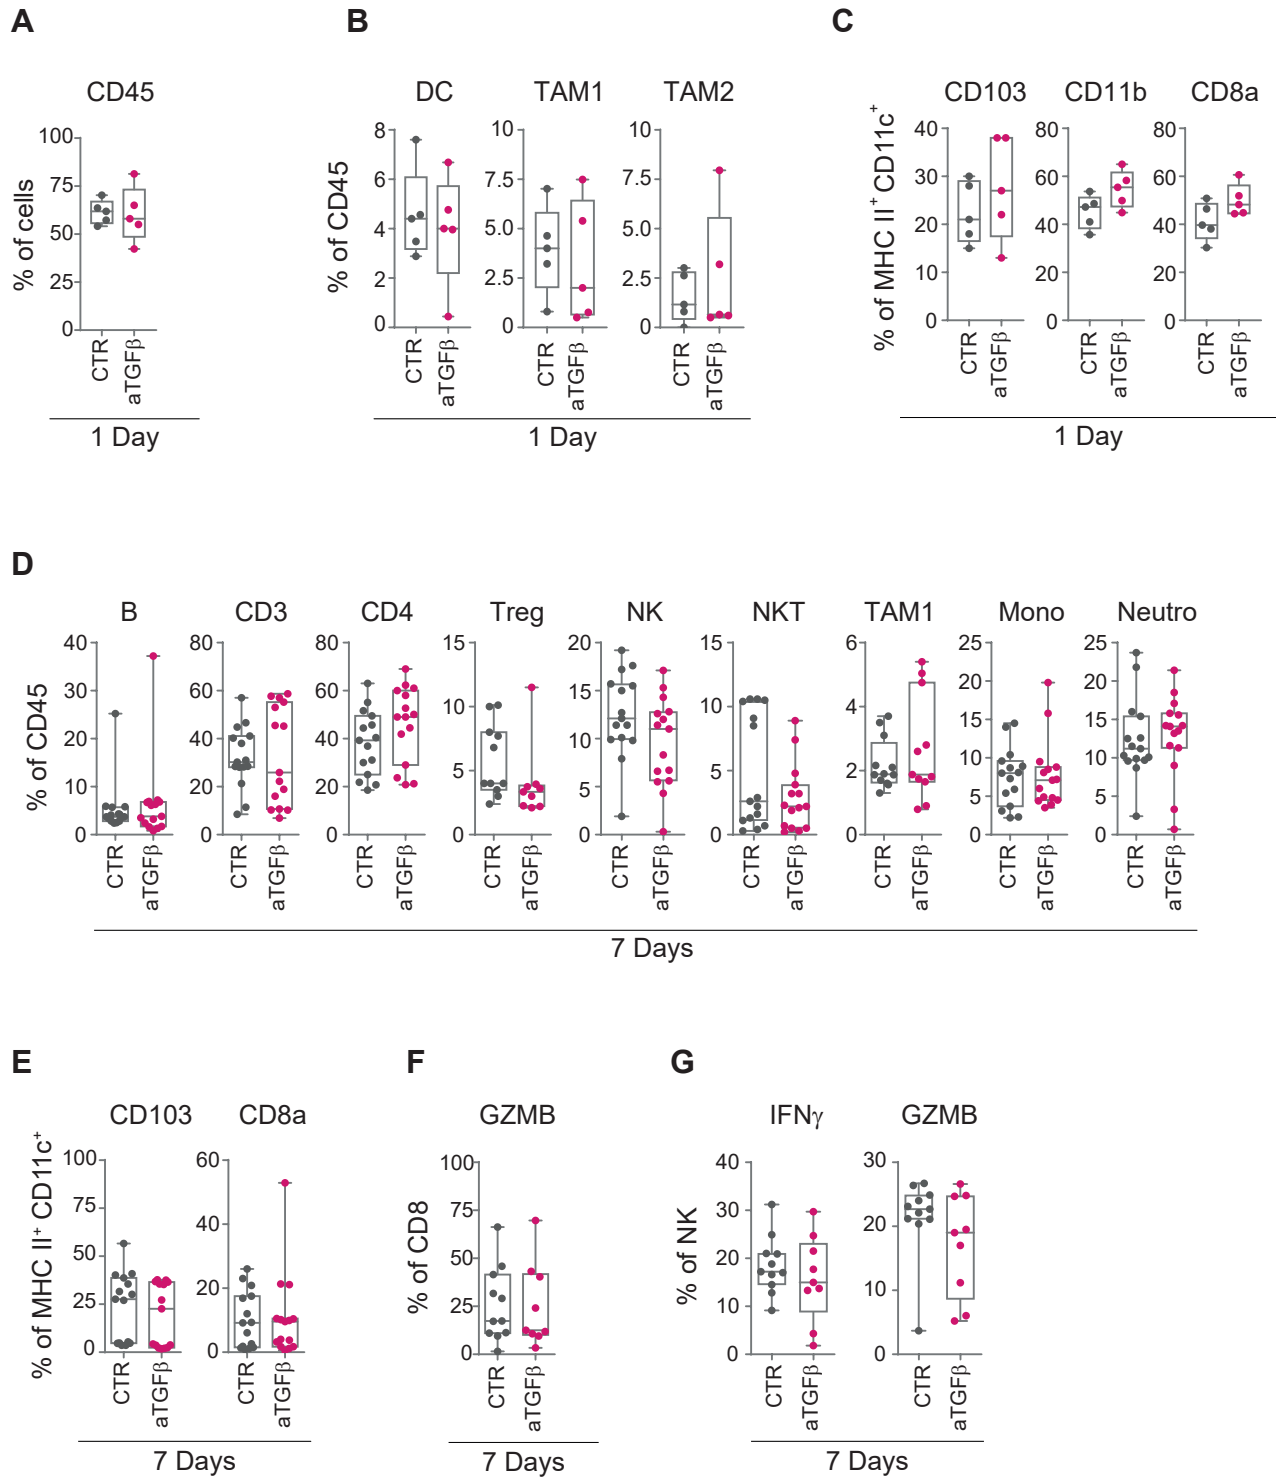

**Figure S4 related to Figure 3. Effect of anti-TGF $\beta$  treatment on immune content of 975A2 tumors.** (A-E) Flow-cytometry analysis of the immune content in 975A2 tumors 1 day (A-C) and 7 days (D-E) after the start of treatment. (F-G) Flow-cytometry analysis of the activation status of tumor-infiltrating CD8<sup>+</sup> T cells (F) and NK cells (G) in 975A2 tumors 7 days after the start of treatment. Levels of significance for comparison between samples were determined by two-tailed Student's t test. CTR, vehicle control; aTGF $\beta$ , anti-TGF $\beta$ ; GZMB, granzyme B. Non-significant data are shown.

**Figure S5**

**A**

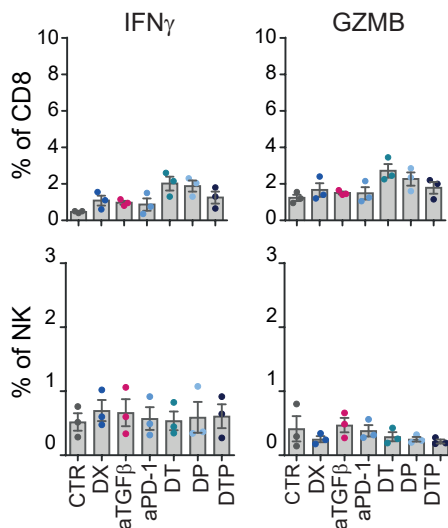

**B**

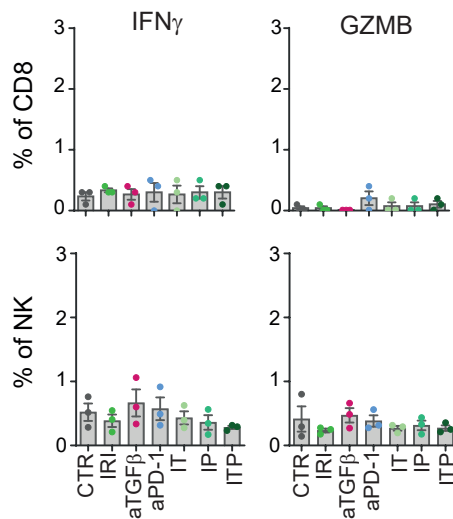

**C**

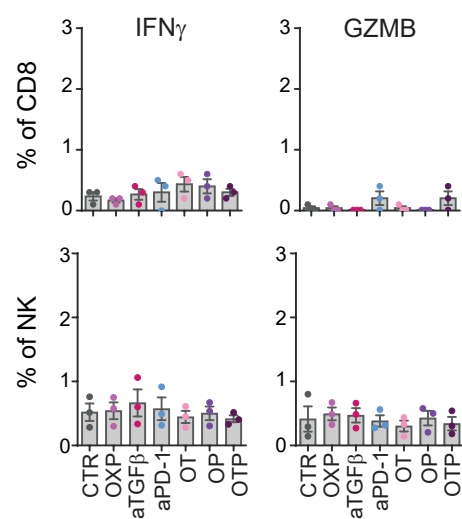

**D**

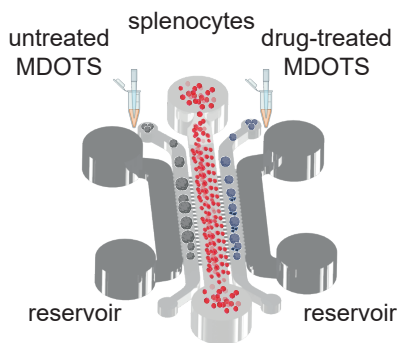

**E**

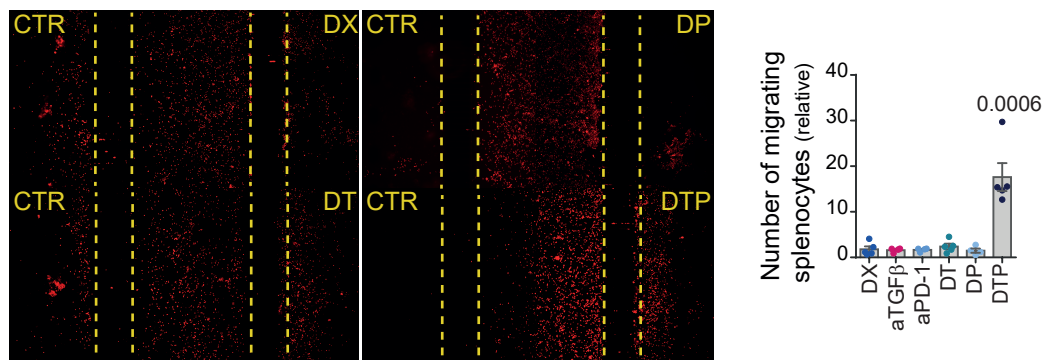

**F**

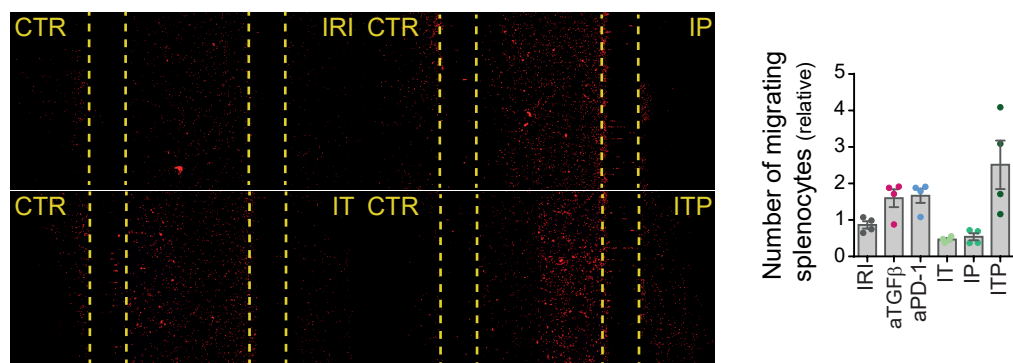

**G**

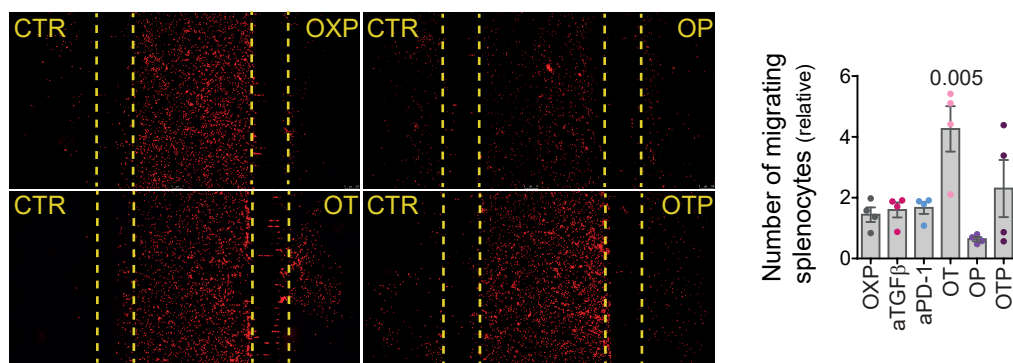

**Figure S5 related to Figure 4. Effect of combined drug treatment on the recall and activation of CD8<sup>+</sup> T cells and NK cells.** (A-C) Flow-cytometry analyses of IFN $\gamma$  and granzyme B expression of CD8<sup>+</sup> T cells and NK cells from splenocytes co-cultured 24 hours with drug-treated 975A2 MDOTS. (D) Schematic representation of the microfluidic device. (E-G) Representative images of red-labeled splenocyte migration in microfluidic devices versus drug-treated and untreated 975A2 MDOTS after 24 hours of co-culture. The number of splenocytes from tumor-bearing mice migrating versus treated and untreated 975A2 MDOTS was assessed by ImageJ software. Data are shown as fold change  $\pm$  SD. Levels of significance were determined by ANOVA. CTR, vehicle control; DX, doxorubicin; IRI, irinotecan; OXP, oxaliplatin, aTGF $\beta$ , anti-TGF $\beta$ ; aPD-1, anti-PD-1; DT, doxorubicin and anti-TGF $\beta$ ; DP, doxorubicin and anti-PD-1; DTP, doxorubicin, anti-TGF $\beta$  and anti-PD-1. IT, irinotecan and anti-TGF $\beta$ ; IP, irinotecan and anti-PD-1; ITP, irinotecan, anti-TGF $\beta$  and anti-PD-1. OT, oxaliplatin and anti-TGF $\beta$ ; OP, oxaliplatin and anti-PD-1; OTP, oxaliplatin, anti-TGF $\beta$  and anti-PD-1; GZMB, granzyme B. Statistically significant P values are shown.



**Figure S6**

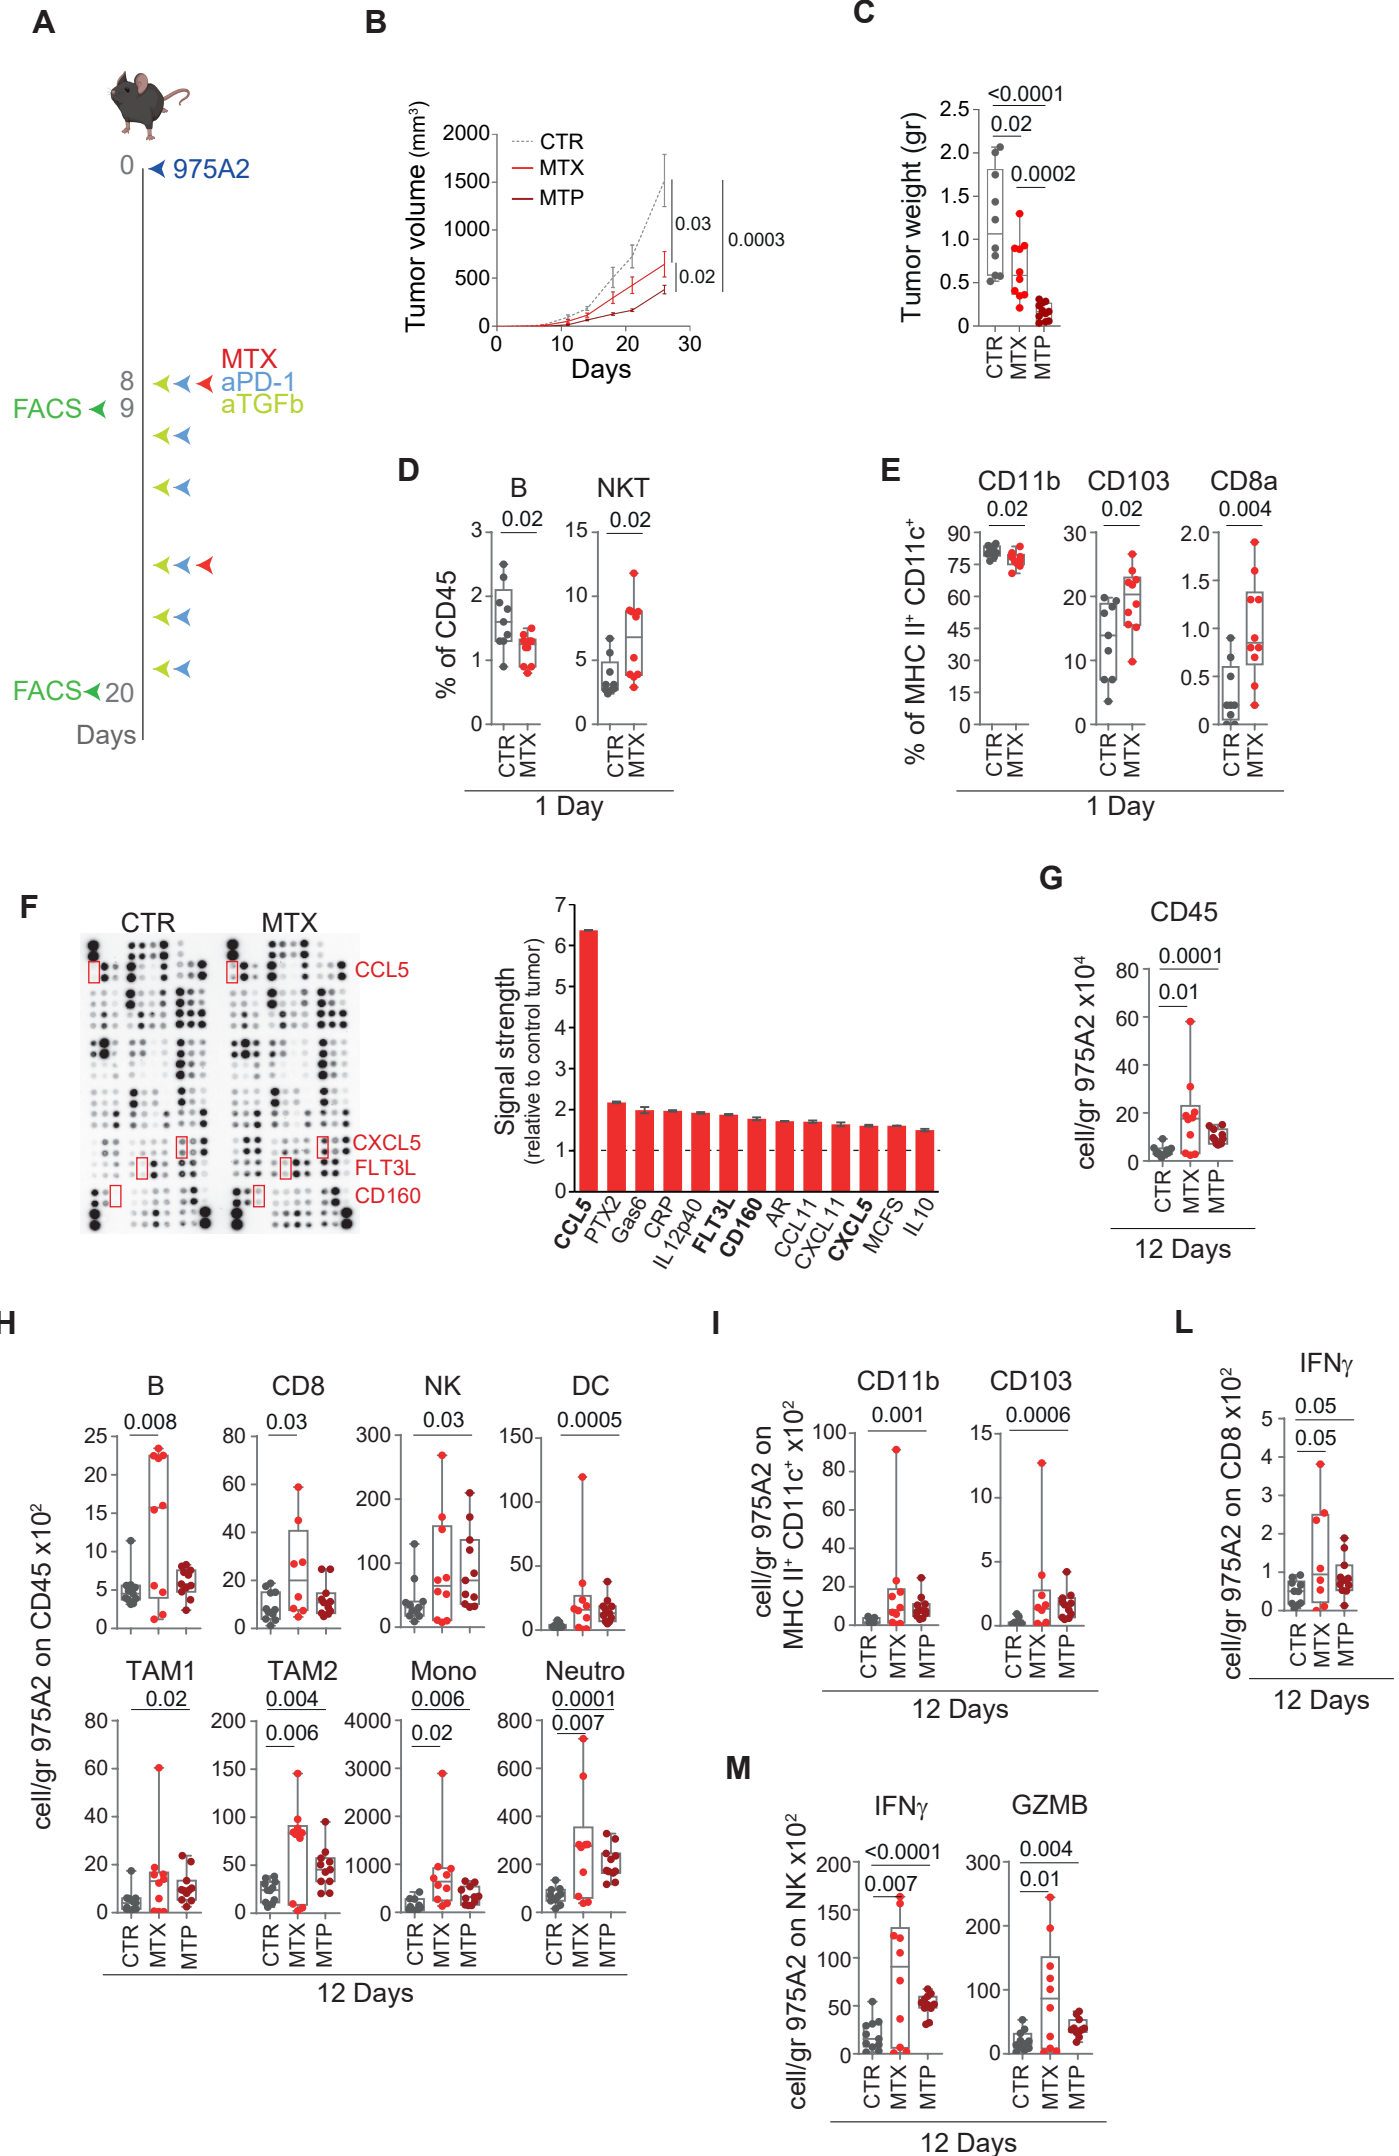

**Figure S6 related to Figure 5. Treatment of mitoxantrone in combination with TGF $\beta$  and PD-1 blockade delays growth of subcutaneously transplanted 975A2 tumors and reshapes intratumoral immune infiltrate.** (A) Schematic representation of the drug treatment and timing of tumor immune infiltrate analysis. (B) Tumor growth of 975A2 injected subcutaneously in C57BL/6 mice and treated as indicated. Significance at day 28 (Mann Whitney test). (C) Weight of explanted tumors at day 28 after cell inoculation. (D-E) Flow-cytometry analysis of the immune compartment in 1 day-MTX-treated 975A2 tumors. Levels of significance for comparison between samples were determined by two-tailed Student's t test. (F) Chemokine expression in 1 day-MTX-treated 975A2 tumor lysates by protein array. Relative chemokine expression based on densitometric analysis is shown on the right. (G-I) Flow-cytometry analysis of the immune compartment. (L-M) Flow-cytometry analysis of the activation status of tumor-infiltrating CD8<sup>+</sup> T cells (L) and NK cells (M) in 975A2 tumors 12 days after treatment is shown. Levels of significance for comparison between samples in G-M were determined by ANOVA. CTR, vehicle control; MTX, mitoxantrone; MTP, mitoxantrone, anti-TGF $\beta$  and anti-PD-1; GZMB, granzyme B. Statistically significant P values are shown.

Figure S7

A

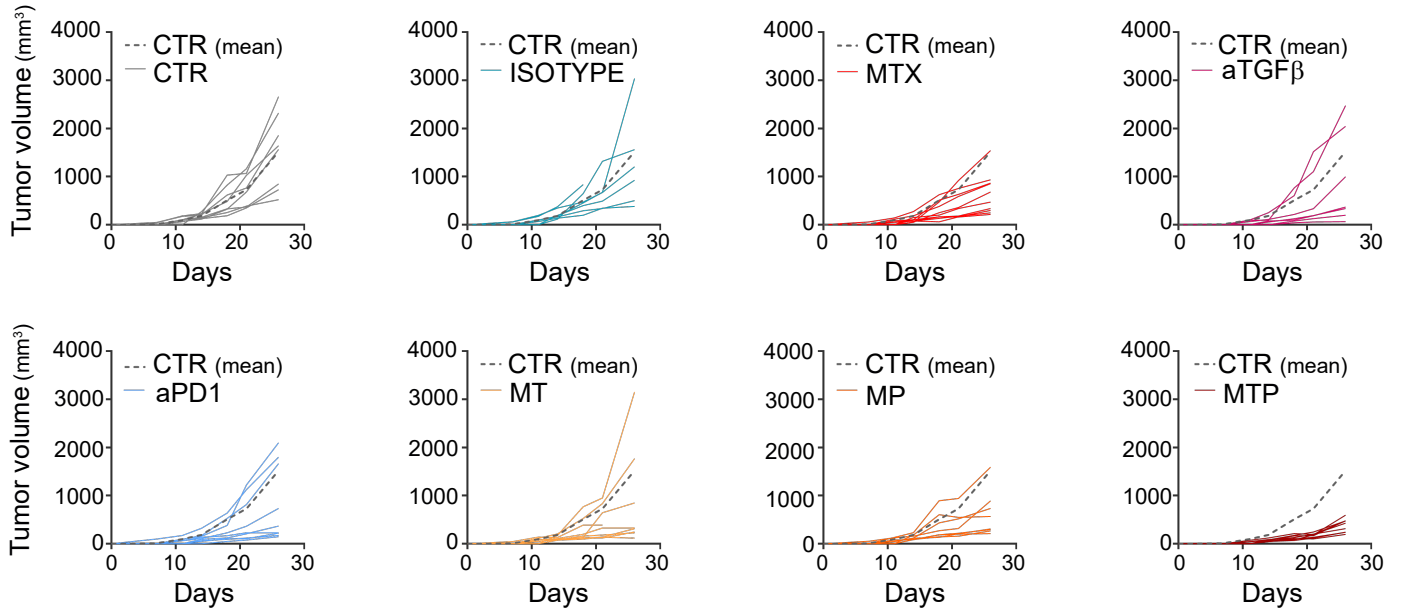

B

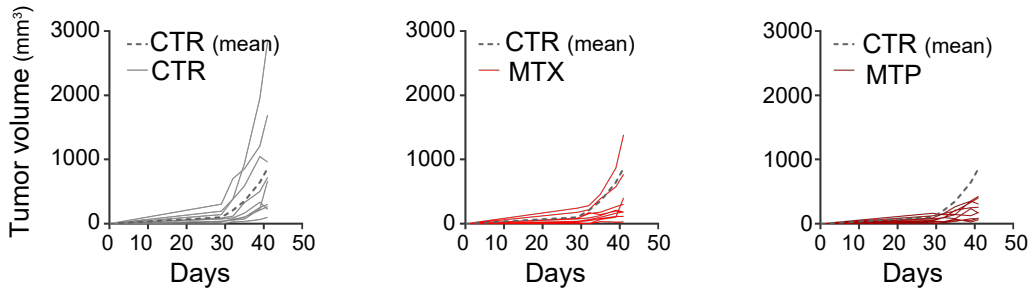

**Figure S7 related to Figure 5. Tumor growth of drug-treated 975A2 and 9464D.** Tumor growth of 975A2 (A) and 9464D (B) injected subcutaneously in C57BL/6 mice and treated as indicated. The average growth of the control tumors is indicated in each graph with a dotted line. CTR, vehicle control; MTX, mitoxantrone; aTGF $\beta$ , anti-TGF $\beta$ ; aPD-1, anti-PD-1; MT, mitoxantrone and anti-TGF $\beta$ ; MP, mitoxantrone and anti-PD-1; MTP, mitoxantrone. Levels of significance for comparison between samples were determined by Mann Whitney test. Non-significant data are shown.

Figure S8

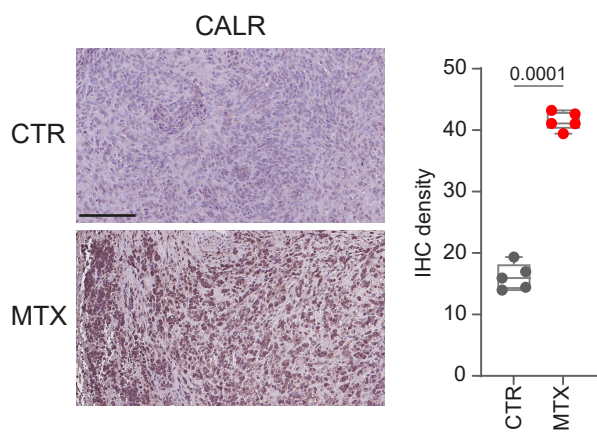

**Figure S8 related to Figure 5. Expression of calreticulin in 9464D tumors.**

Representative example of calreticulin (CALR) staining in 9464D tumors grown subcutaneously in C57BL/6 mice. Brown, calreticulin-expressing cells. Nuclei were counterstained with hematoxylin (blue). Original magnifications, x20. Scale bars, 30  $\mu$ m. IHC density was assessed by ImageJ software by measuring 5 different areas of the slide on five independent mice for each condition, and the mean  $\pm$  SD of integrated density are reported in the histogram. Levels of significance for comparison between samples were determined by two-tailed Student's t test.

Figure S9

**A**

1 Day

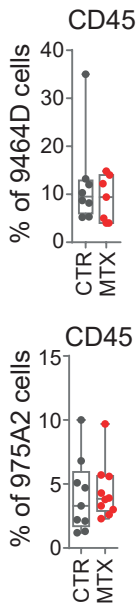

**B**

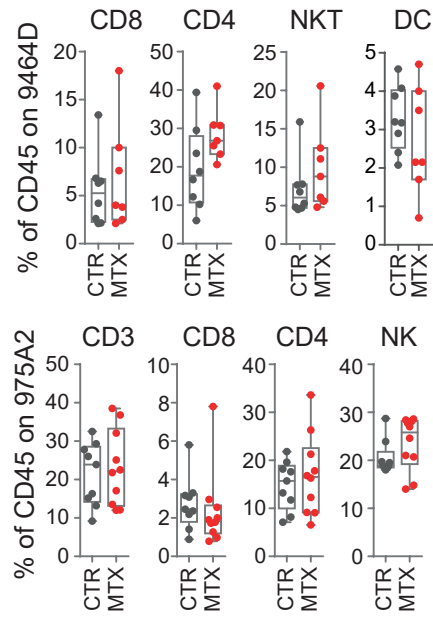

**C**

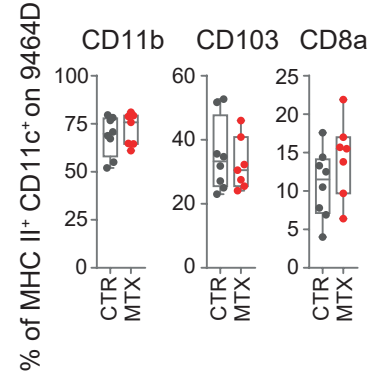

**D**

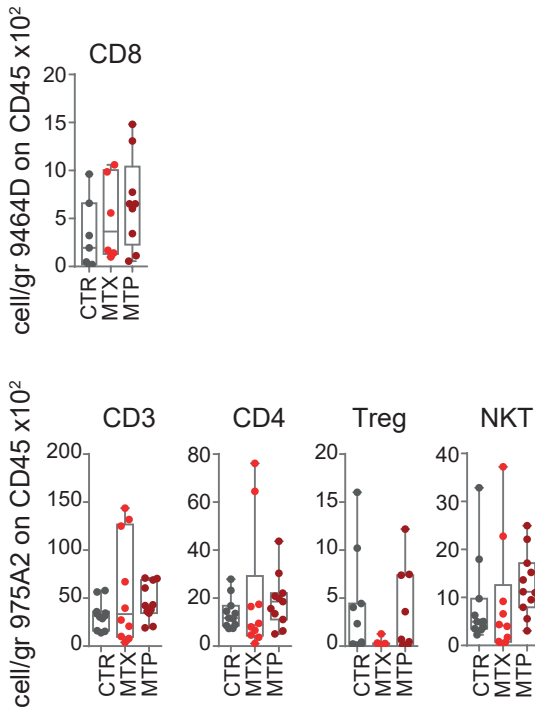

**E**

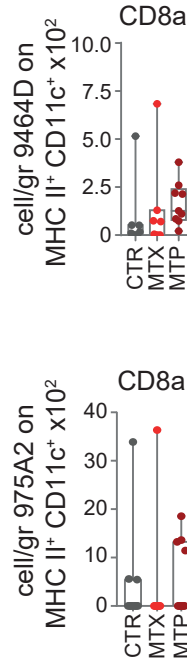

12 Days

**F**

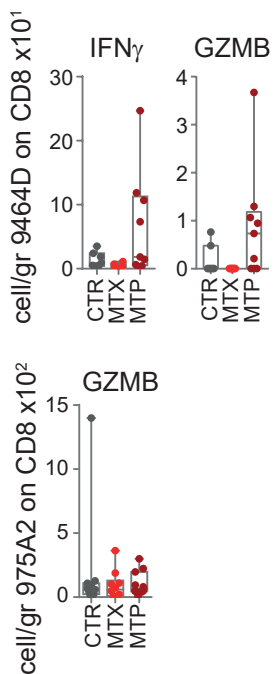

**Figure S9 related to Figure 5 and Figure S6. Immune content of drug-treated 9464D and 975A2 tumors.** Flow-cytometry analysis of the immune content in 9464D and 975A2 tumors (upper and lower panels, respectively) 1 day (**A-C**) and 12 days (**D-E**) after treatment with the indicated drugs. (**F**) Flow-cytometry analysis of the activation status of tumor-infiltrating CD8<sup>+</sup> T cells in 9464D and 975A2 tumors (upper and lower panels, respectively) 12 days after treatment. Levels of significance for comparison between samples were determined by two-tailed Student's t test (**A-C**) and ANOVA (**D-F**). CTR, vehicle control; MTX, mitoxantrone; MTP, mitoxantrone, anti-TGFβ and anti-PD-1; GZMB, granzyme B. Non-significant data are shown.



Figure S10

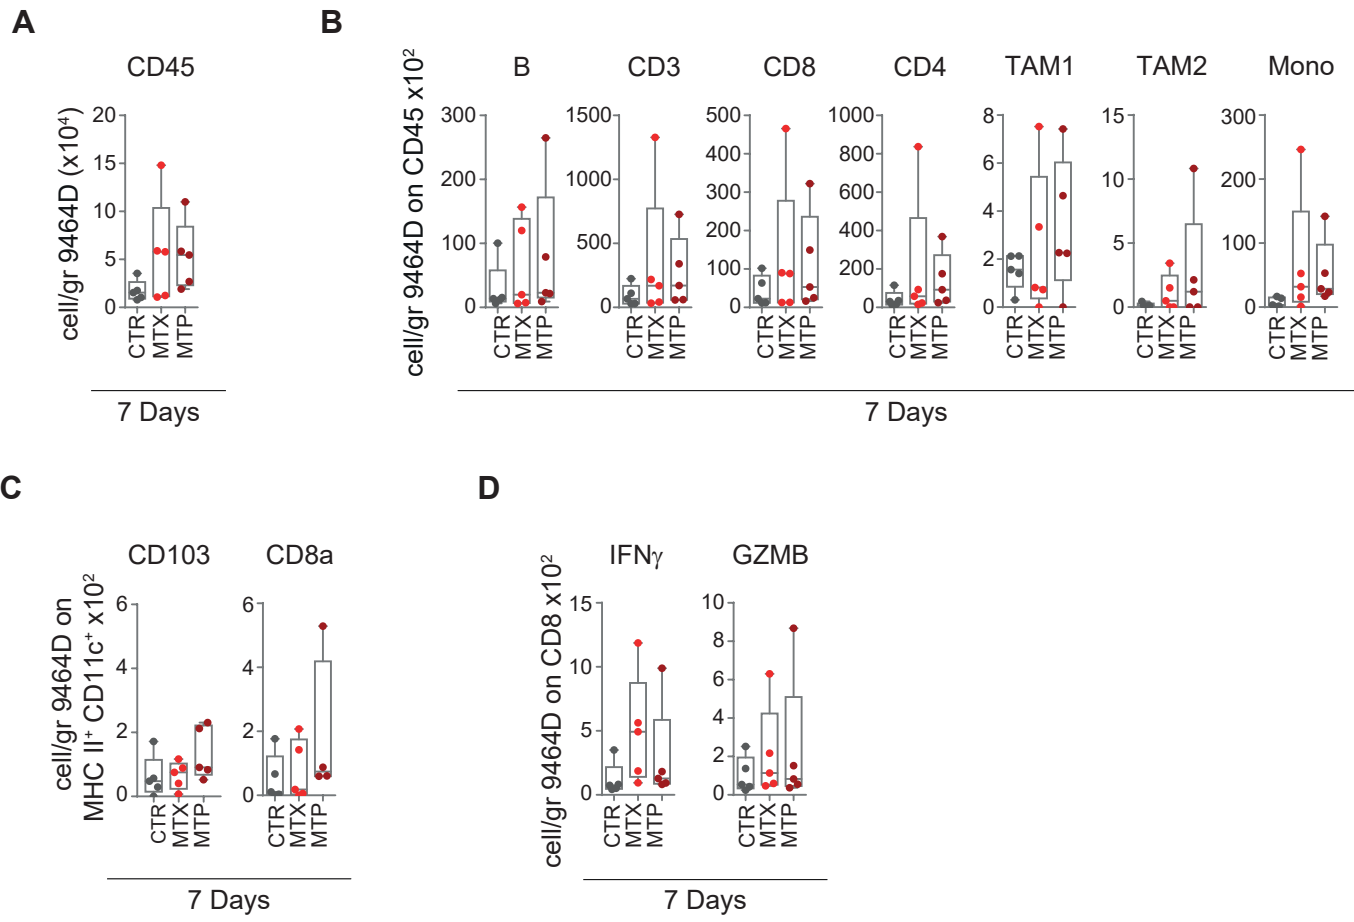

**Figure S10 relative to Figure 6. Immune content of drug-treated 9464D grown in the adrenal gland.** (A-C) Flow-cytometry analysis of the immune content in 9464D 7 days after the start of treatment with the indicated drugs is shown. (D) Flow-cytometry analysis of the activation status of tumor-infiltrating CD8<sup>+</sup> T cells in 9464D tumors 7 days after the start of treatment is shown. Levels of significance for comparison between samples were determined by ANOVA. Non-significant data are shown. CTR, vehicle control; MTX, mitoxantrone; MTP, mitoxantrone, anti-TGFβ and anti-PD-1; GZMB, granzyme B.

Figure S11

A

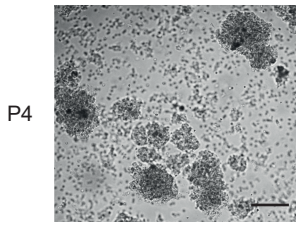

B

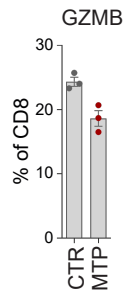

C

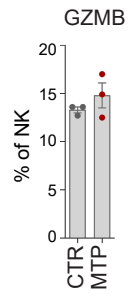

D

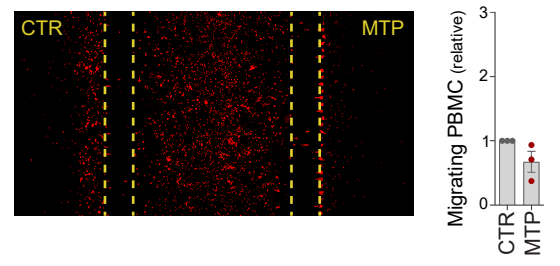

**Figure S11 relative to Figure 7. Mitoxantrone recalls activated CD8<sup>+</sup> T cells and NK cells in some PDOTS when combined with TGFβ and PD-1 blockade.**

(A) Representative images of PDOTS derived from P4 NB patient. Original magnification, x20. Scale bar, 30 μm. (B and C) Flow-cytometry analysis of granzyme B expression by CD8<sup>+</sup> T cells (B) and NK cells (C) of autologous PBMCs co-cultured for 24 hours with drug-treated PDOTS. (D) Representative images of the migration of red-labeled autologous PBMCs in microfluidic devices to drug-treated and untreated PDOTS after 24 hours of co-culture. The number of PBMCs migrating versus drug-treated and untreated PDOTS was assessed by ImageJ software. Data are shown as fold change ± SD. Levels of significance for comparison between samples were determined by two-tailed Student's t test. MTX, mitoxantrone; CTR, vehicle control; MTP, mitoxantrone, anti-TGFβ and anti-PD-1; GZMB, granzyme B. Non-significant data are shown.

Figure S12

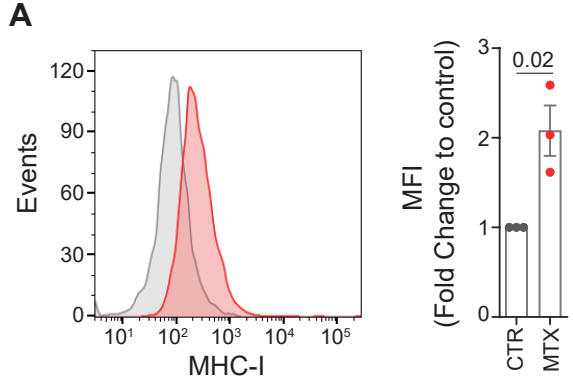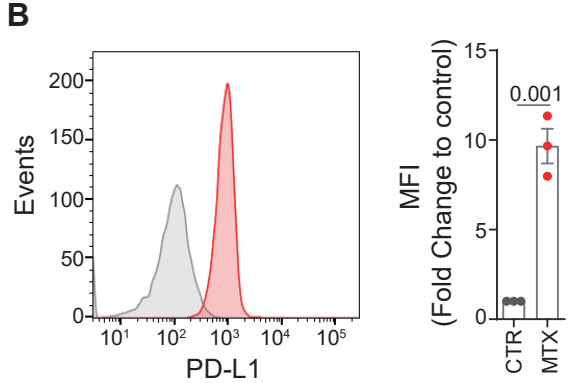

**Figure S12. Mitoxantrone TME of drug-treated 9464D grown in the adrenal gland. (A-B)** Representative flow-cytometry analyses (left) of MHC class I (A) and PD-L1 (B) in MDOTS derived from 9464D orthotopic model treated 24 hours with MTX. Mice treated with vehicle or MTX are shown as grey and red plots, respectively. The graphs on the right represent the fold changes in MFI  $\pm$  SD from three independent experiments. Levels of significance for comparison between samples were determined by the two-tailed Student's *t* test. CTR, vehicle control; MTX, mitoxantrone; MFI, mean fluorescence intensity. Statistically significant, *P* values are shown.

**Table S1.** List of antibodies

| <b>MARKER</b>                  | <b>Fluorochrome</b> | <b>Clone</b> | <b>Company</b> | <b>Catalog</b> | <b>Application</b> | <b>Dilution</b> |
|--------------------------------|---------------------|--------------|----------------|----------------|--------------------|-----------------|
| anti-mouse CD45                | BV605               | 30-F11       | BD Biosciences | 563053         | FACS               | 1:40            |
| anti-mouse B220                | APC                 | RA3-6B2      | BD Biosciences | 553092         | FACS               | 1:40            |
| anti-mouse CD3                 | BUV395              | 145-2C11     | BD Biosciences | 565992         | FACS               | 1:40            |
| anti-mouse CD4                 | PE CY7              | GK1.5        | BD Biosciences | 563933         | FACS               | 1:40            |
| anti-mouse CD8                 | BUV805              | 53-6.7       | BD Biosciences | 612898         | FACS               | 1:40            |
| anti-mouse CD25                | PE                  | PC61         | BD Biosciences | 553866         | FACS               | 1:40            |
| anti-mouse NK1.1               | BV421               | PK136        | BD Biosciences | 562921         | FACS               | 1:40            |
| anti-mouse FOXP3               | PerCP CY5.5         | FJK-16s      | eBiosciences   | 45-5773-82     | FACS               | 1:10            |
| anti-mouse CD44                | BV421               | IM7          | BD Biosciences | 563970         | FACS               | 1:40            |
| anti-mouse CD62L               | APC                 | MEL-14       | BD Biosciences | 561919         | FACS               | 1:40            |
| anti-mouse CD69                | APC CY7             | H1.2F3       | BD Biosciences | 561240         | FACS               | 1:40            |
| anti-mouse TGF $\beta$         | PE                  | /            | R&D SYSTEMS    | IC1835P        | FACS               | 1:10            |
| anti-mouse CD11B               | PerCP CY5.5         | M1/70        | BD Biosciences | 550993         | FACS               | 1:40            |
| anti-mouse CD11C               | BUV395              | N418         | BD Biosciences | 744180         | FACS               | 1:40            |
| anti-mouse MHC II              | APC                 | M5/114.15.2  | BioLegend      | 107614         | FACS               | 1:40            |
| anti-mouse Ly6C                | APC CY7             | HK1.4        | BioLegend      | 128026         | FACS               | 1:40            |
| anti-mouse Ly6G                | PE CY7              | 1A8          | BioLegend      | 127618         | FACS               | 1:40            |
| anti-mouse F4/80               | PE                  | BM8          | BioLegend      | 123109         | FACS               | 1:40            |
| anti-mouse CD103               | BV421               | 2E7          | BioLegend      | 121421         | FACS               | 1:40            |
| anti-mouse CD40                | PE                  | 1C10         | eBiosciences   | 12-0401-82     | FACS               | 1:40            |
| anti-mouse CD86                | PE CY7              | GL1          | eBiosciences   | 25-0862-82     | FACS               | 1:40            |
| anti-mouse IFN $\gamma$        | PE CY7              | XMG1.2       | BD Biosciences | 561040         | FACS               | 1:10            |
| anti-mouse GRZB                | APC                 | NGZB         | eBiosciences   | 17-8898-82     | FACS               | 1:10            |
| anti-mouse PD-1                | APC                 | J43          | BD Biosciences | 562671         | FACS               | 1:40            |
| anti-mouse PD-L1               | BV711               | MIH5         | BD Biosciences | 563369         | FACS               | 1:40            |
| anti-mouse MHC-I               | PerCP Cy5.5         | C3H          | Biolegend      | 114619         | FACS               | 1:40            |
| anti-mouse GD2                 | AF647               | 14.G2a       | BD Biosciences | 562096         | FACS               | 1:40            |
| anti-human CD45                | BUV805              | HI30         | BD Biosciences | 612891         | FACS               | 1:40            |
| anti-human CD3                 | BB700               | SK7          | BD Biosciences | 566575         | FACS               | 1:40            |
| anti-human CD8                 | BUV395              | RPA-T8       | BD Biosciences | 563795         | FACS               | 1:40            |
| anti-human NKp46               | BV711               | 9E2/NKp46    | BD Biosciences | 563043         | FACS               | 1:40            |
| anti-human GZMB                | BV510               | GB11         | BD Biosciences | 563388         | FACS               | 1:40            |
| anti-mouse/human synaptophysin | /                   | SY38         | Invitrogen     | MA1-213        | IHC                | 1:50            |
| calreticulin                   | /                   | /            | Abcam          | ab2907         | IHC                | 1:500           |
| anti-mouse NK.1.1              | /                   | PK136        | Invitrogen     | MA1-70100      | IF                 | 1:50            |
| anti-mouse GZMB                | /                   | D2H2F        | Cell Signaling | 17215          | IF                 | 1:100           |
| Goat-anti-mIgG                 | Alexa-Fluor488      | /            | Invitrogen     | A-11017        | IF                 | 1:500           |
| Goat-anti-rIgG                 | Alexa-Fluor594      | /            | Invitrogen     | A-11037        | IF                 | 1:500           |

**Table S2:** Clinical and genetic characteristics of 7 newly diagnosed NB patients.

| <b>Patient</b> | <b>Age ad diagnosis (months)</b> | <b>Gender</b> | <b>Stage (INRG)</b> | <b>Histologic classification (INCP or Shimada)</b> | <b>Grade of NB differentiation (INCP or Shimada)</b> | <b>MYCN status</b> | <b>PDOTS formation</b> | <b>PDOTS responsiveness</b> |
|----------------|----------------------------------|---------------|---------------------|----------------------------------------------------|------------------------------------------------------|--------------------|------------------------|-----------------------------|
| P1             | 3                                | Male          | L1                  | Favorable                                          | Undifferentiated                                     | Not amplified      | No                     | /                           |
| P2             | 18                               | Male          | L1                  | Intermediate                                       | Undifferentiated                                     | Not amplified      | No                     | /                           |
| P3             | 13                               | Male          | L2                  | Favorable                                          | Undifferentiated                                     | Not amplified      | No                     | /                           |
| <b>P4</b>      | 35                               | Female        | L2                  | Unfavorable                                        | Undifferentiated                                     | Not amplified      | Yes                    | No                          |
| <b>P5</b>      | 22                               | Female        | M                   | Unfavorable                                        | Undifferentiated                                     | Not amplified      | Yes                    | Yes                         |
| <b>P6</b>      | 96                               | Male          | M                   | Unfavorable                                        | Undifferentiated                                     | Not amplified      | Yes                    | Yes                         |
| <b>P7</b>      | 1                                | Male          | MS                  | Favorable                                          | Undifferentiated                                     | Not amplified      | Yes                    | Yes                         |

Patients analyzed are indicated in bold.
